# Supplementary material
Source: HighWire-hosted journal article supplement (http://jpet.aspetjournals.org/highwire/filestream/143904/field_highwire_adjunct_files/0/253443SupplData.pdf)

Journal of Pharmacology and Experimental Therapeutics

SUPPLEMENTAL DATA

JPET manuscript #: 253443

**TITLE: “Pharmacologic Characterization of ALD1910, a Potent Humanized Monoclonal Antibody against the Pituitary Adenylate Cyclase Activating Peptide”**

**Authors:** Cristina Moldovan Loomis, Benjamin Dutzar, Ethan W. Ojala, Lee Hendrix, Charlie Karasek, Michelle Scalley-Kim, Jenny Mulligan, Pei Fan, Jens Billgren, Vanessa Rubin, Heidi Boshaw, Gayle Kwon, Sam Marzolf, Erica Stewart, David Jurchen, Susan M. Pederson, Lisa Perrino McCulloch, Brian Baker, Roger K. Cady, John A. Latham, Dan Allison, and Leon F. Garcia-Martinez

**SUPPLEMENTAL FIGURE LEGENDS****Supplemental Figure 1. PACAP38, but not PACAP27 binds CHO-K1 cell surface.**

CHO-K1 cells were stained with increasing amounts of N-term biotinylated PACAP38 (black line 125 nM; blue line 62.5 nM; red line 31.3 nM; green line 15.6 nM; brown line 7.8nM; magenta line negative control ) (A) or biotinylated N-term PACAP27 (black line 20  $\mu$ M; blue line 10  $\mu$ M; red line 5  $\mu$ M; green line 1  $\mu$ M; brown line 0.5  $\mu$ M; magenta line negative control ) (B) and a constant amount of streptavidin-PE prior to FACS analysis.

**Supplemental Figure 2. HC-030031 inhibits umbellulone-induced increase in facial**

**temperature.** HC-030031, administered 1 hr prior to umbellulone exposure, inhibits umbellulone-induced temperature increase. 12 animals per group (Mann-Whitney test).

### Supplemental Figure 1

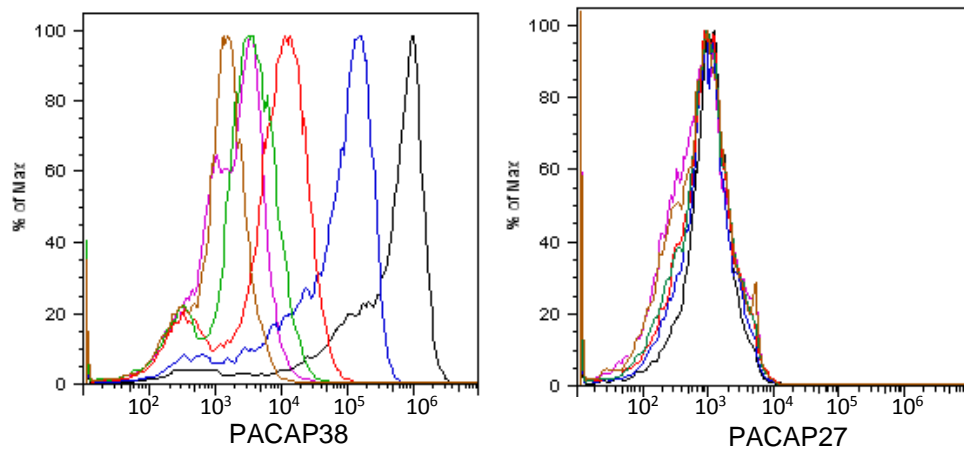

Supplemental Figure 2

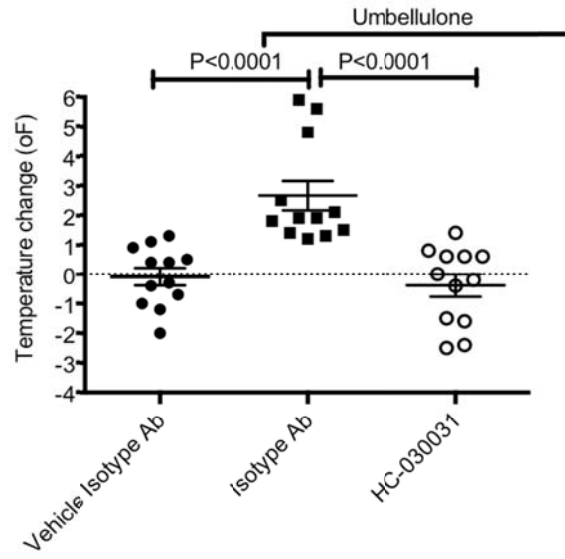

Supplement: 253443SupplData.pdf [file 253443SupplData.pdf]
